# Supplementary material
Source: PubMed Central journal article supplement (PMC3792685)
Supplement: f-69-01182-sup1.pdf [file f-69-01182-sup1.pdf]

## Supplementary Material

**Supplementary Table S1** SpaA tryptic-peptide fragments generated by ESI Triple TOF mass analysis, and identified using the Mascot search engine.

### A. Primary structure identity of SpaA tryptic-peptide fragments<sup>a</sup>

|                   |                   |                    |                    |                    |     |
|-------------------|-------------------|--------------------|--------------------|--------------------|-----|
| MKKTIAKKVL        | TLTSTILMTL        | LMVLGFNGTR         | VQADTNDTTT         | QNVVLTKYGF         | 50  |
| DKDVT AIDRA       | TDQIWTGDGA        | KPLQGVDFTI         | YNVTANYWAS         | PK <b>DYKGSFDS</b> | 100 |
| <b>APVAATGTTN</b> | <b>DKGQLTQALP</b> | <b>IQSK</b> DASGKT | RAAVYLFHET         | NPR <b>AGYNTSA</b> | 150 |
| <b>DFWLTLPAKA</b> | AADGNVYVYP        | KNVQKTTYER         | TFVKKDAETK         | EVLEGAGFK <b>I</b> | 200 |
| <b>SNSDGKFLKL</b> | <b>TDKDGQSVSI</b> | <b>GEGFIDVLAN</b>  | <b>NYR</b> LTWVAES | DATVFTSDKS         | 250 |
| GKFG LN GFAD      | NTTTYTAVET        | NVPDGYDAAA         | NTDFKADNSS         | SDILDAPSGI         | 300 |
| LPHTGGTGTV        | IFAILGVALI        | AFGAVAYRKR         | RNGF               |                    | 334 |

### B. Mascot search analysis of SpaA tryptic-peptide fragments

| Start-End <sup>b</sup> | MW <sub>obs</sub> <sup>c</sup> | MW <sub>pred</sub> <sup>d</sup> | Miss <sup>e</sup> | Sequence <sup>f</sup>                 |
|------------------------|--------------------------------|---------------------------------|-------------------|---------------------------------------|
| 93 – 112               | 2044.77                        | 2044.92                         | 1                 | K.DYKGSFDSAPVAAT<br>GTTNDK.G          |
| 96 – 124               | 2903.72                        | 2903.45                         | 1                 | K.GSFDSAPVAATGTTN<br>DKGQLTQALPIQSK.D |
| 144 – 159              | 1754.76                        | 1754.85                         | 0                 | R.AGYNTSADFWLTLP<br>AK.A              |
| 200 - 209              | 1107.69                        | 1107.59                         | 1                 | K.ISNSDGKFLK.L                        |
| 210 – 233              | 2611.30                        | 2611.28                         | 1                 | K.LTDKDGQSVSIGEGFI<br>DVLANNYR.L      |

<sup>a</sup>Matched amino acids for SpaA protein in tryptic-peptide fragments generated by ESI Triple TOF mass analysis are shown in red bold-face type.

<sup>b</sup> Residue number of first and last amino acid in each tryptic-peptide fragment.

<sup>c</sup> MW of tryptic-peptide fragments as identified by ESI Triple TOF MS analysis.

<sup>d</sup> Predicted MW of tryptic-peptide fragments.

<sup>e</sup> Missed number of trypsin cleavage sites.

<sup>f</sup> Actual trypsin cleavage site (.) in peptide fragment sequences.
